# Supplementary material for: Propagation of oestrogen receptor-positive and oestrogen-responsive normal human breast cells in culture
Source: PubMed Central journal article supplement (PMC4660059; doi:10.1038/ncomms9786), 2015-11-13
Supplement: ncomms9786-s1.pdf [file ncomms9786-s1.pdf]

**Supplementary Figure 1. Ks20.8 staining is independent of antibody supplier and ER staining when detected by immunofluorescence reflects ER/PR staining**

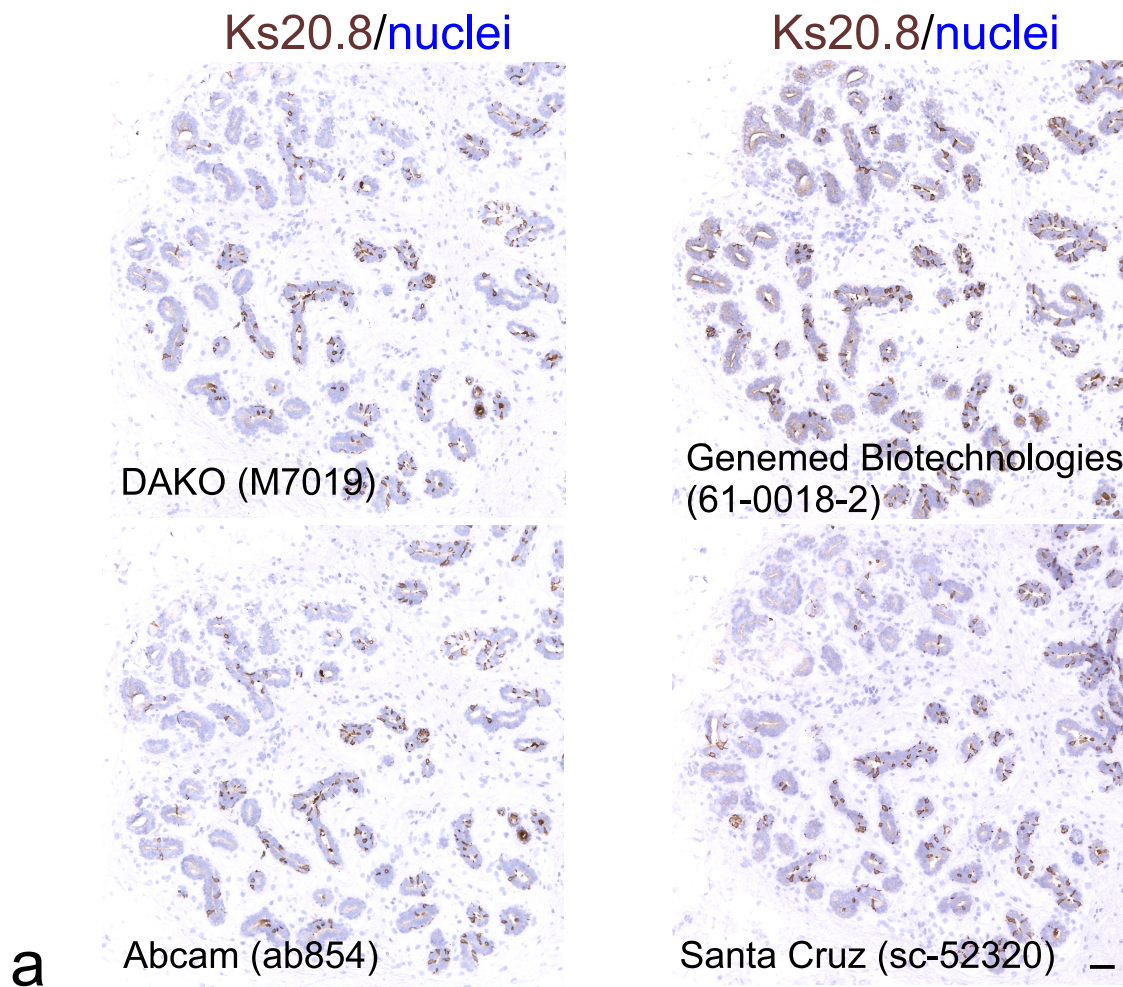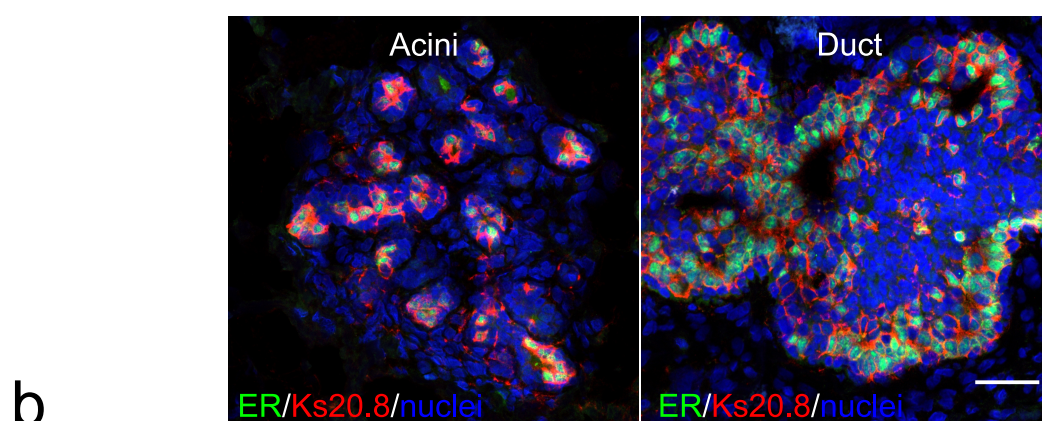

(a) Micrographs of serially sectioned human breast tissue immunoperoxidase stained with Ks20.8 purchased from four different suppliers (DAKO, Abcam, Genemed and Santa Cruz). All antibodies showed the same staining pattern. Nuclei are counterstained with hematoxylin. Bar = 50 $\mu$ m. (b) Multicolor imaging of cryostat sections from the same normal human breast tissue as used in figure 1b and stained with estrogen receptor (SP1; green), Ks20.8 (red), and nuclei (blue). ER protein localizes to essentially the same cells as Ks 20.8 and reflects ER/PR staining in tissues with high expression. Bar=25 $\mu$ m.

**Supplementary Figure 2. Ks20.8 positive cells exhibit an elaborate differentiation program**

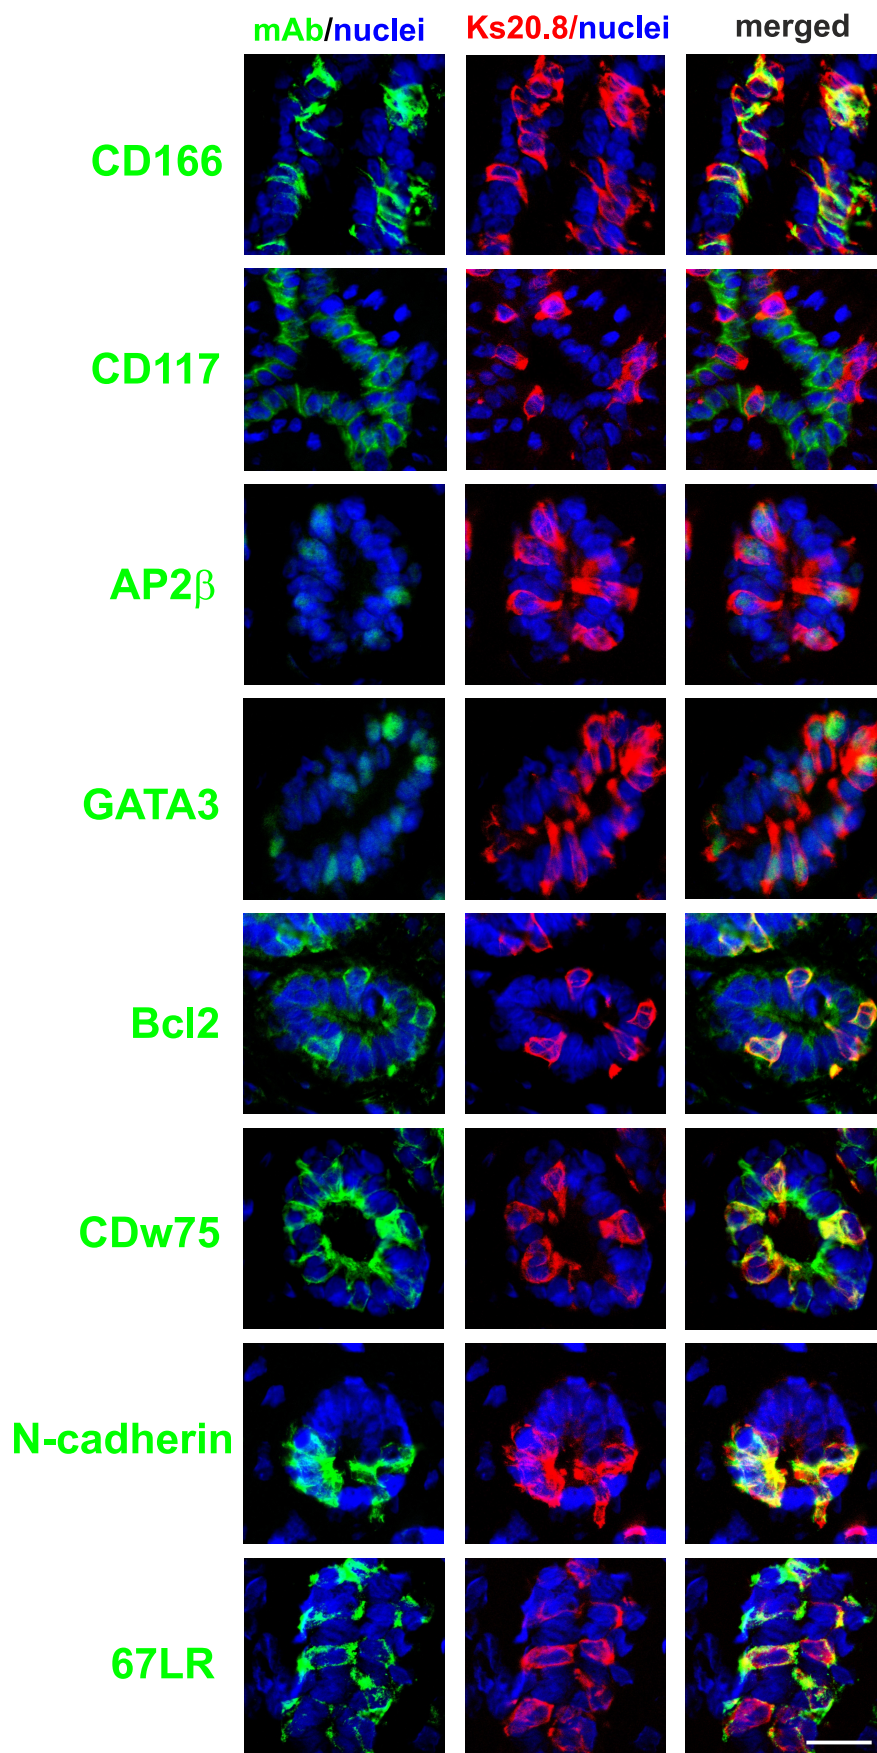

Multicolor imaging of cryostat sections from normal human breast tissue stained with selected mAbs (green) from a library, Ks20.8 (red), and nuclei (blue). Note that selected markers except CD117 are colocalized with Ks20.8. Bar=25 $\mu$ m.

### Supplementary Figure 3. Representative FACS gating strategy of sorted cells

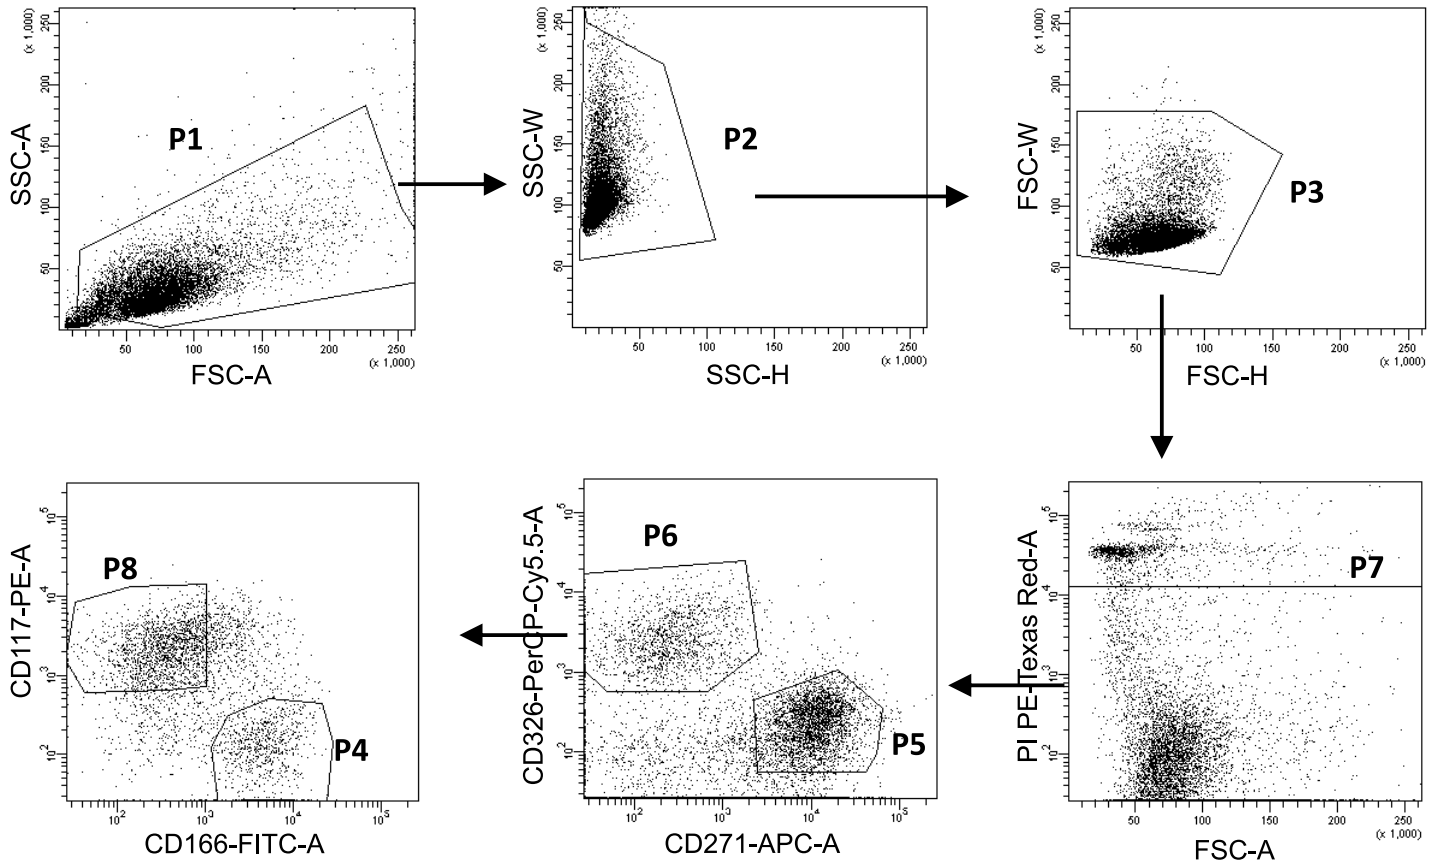

Tube: P790\

| Population | #Events | %Parent | %Total |
|------------|---------|---------|--------|
| All Events | 50,000  | 100.0   | 100.0  |
| P1         | 44,803  | 89.6    | 89.6   |
| P2         | 44,353  | 99.0    | 88.7   |
| P3         | 44,284  | 99.8    | 88.6   |
| P7         | 38,063  | 86.0    | 76.1   |
| P5         | 15,144  | 39.8    | 30.3   |
| P6         | 7,106   | 18.7    | 14.2   |
| P4         | 1,737   | 24.4    | 3.5    |
| P8         | 3,319   | 46.7    | 6.6    |

Cells were gated on forward scatter (FSC) and side scatter (SSC) to remove debris and select for single cells. Propidium iodide was used to select for live cells which were then further gated for luminal CD326<sup>high</sup> cells (P6) and basal CD271<sup>high</sup> cells (P5). CD326<sup>high</sup> luminal cells were further sub-gated as non-overlapping gates of CD166<sup>high</sup> (P4) and CD117<sup>high</sup> (P8).

**Supplementary Figure 4. Hormone receptor expression is restricted essentially to the Ks20.8<sup>pos</sup> compartment**

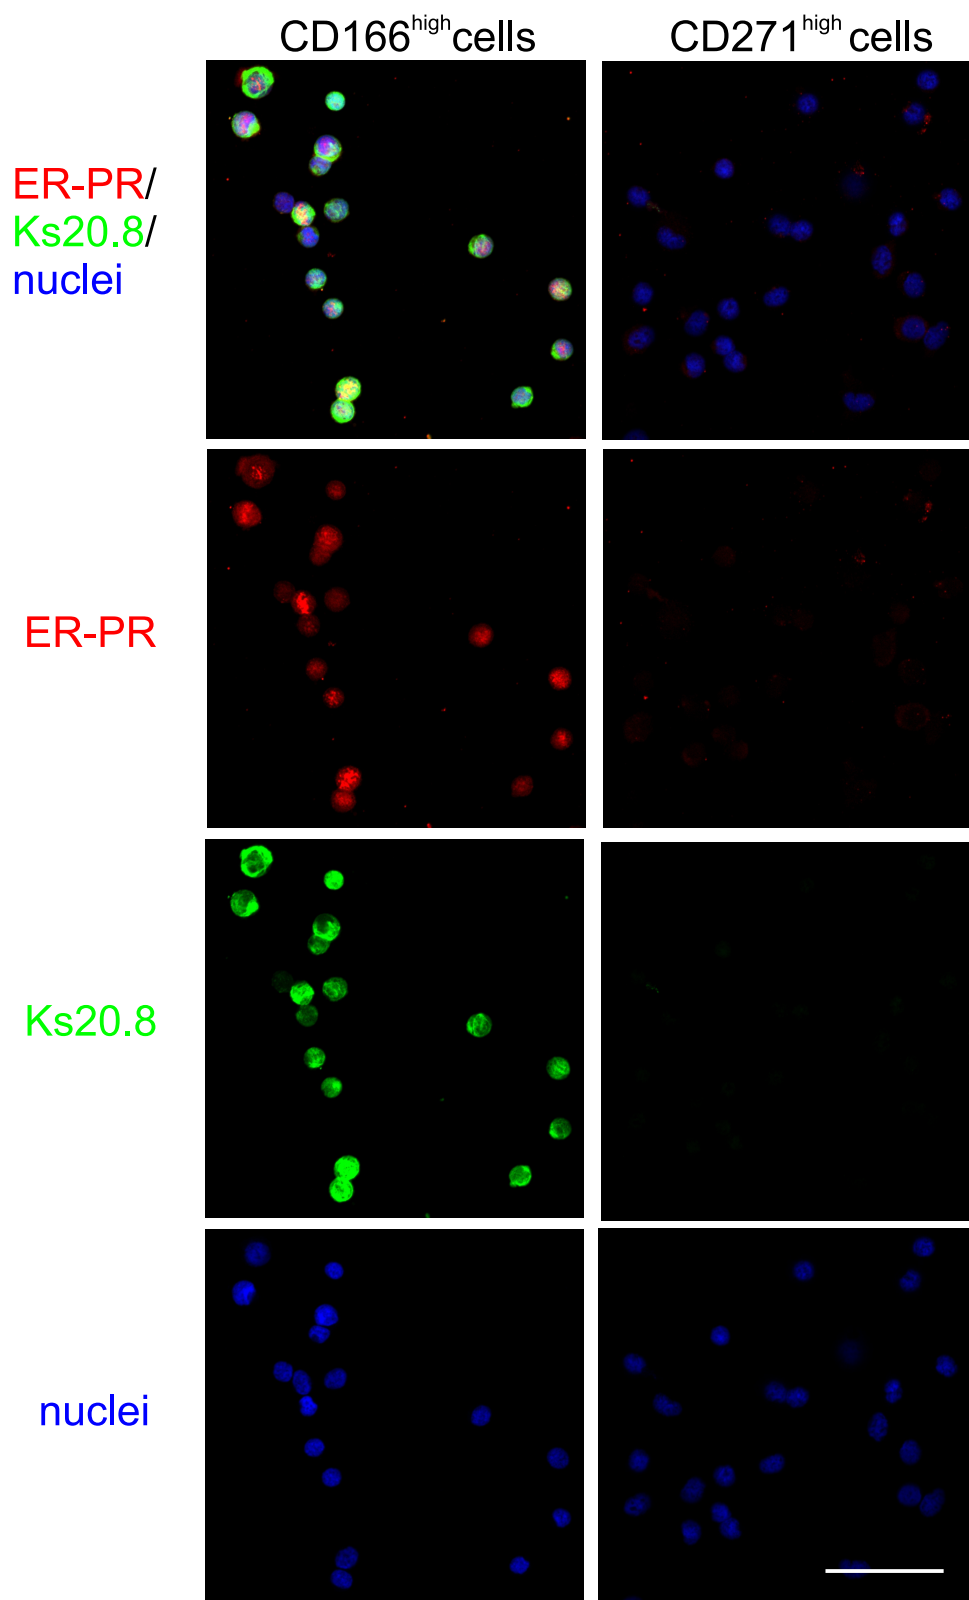

Multicolor imaging of smears of normal human CD166<sup>high</sup>/CD117<sup>low</sup> (CD166<sup>high</sup> cells) and basal cells (CD271<sup>high</sup> cells) purified by FACS and stained with ER-PR (SP1, SP2; red), Ks20.8 (green) and nuclei (blue). The vast majority of ER-PR<sup>pos</sup> cells are contained within the Ks20.8<sup>pos</sup> compartment. Bar=50  $\mu$ m.

## Supplementary Figure 5. Profiling of basal cells, CD117<sup>high</sup> and CD166<sup>high</sup> cells

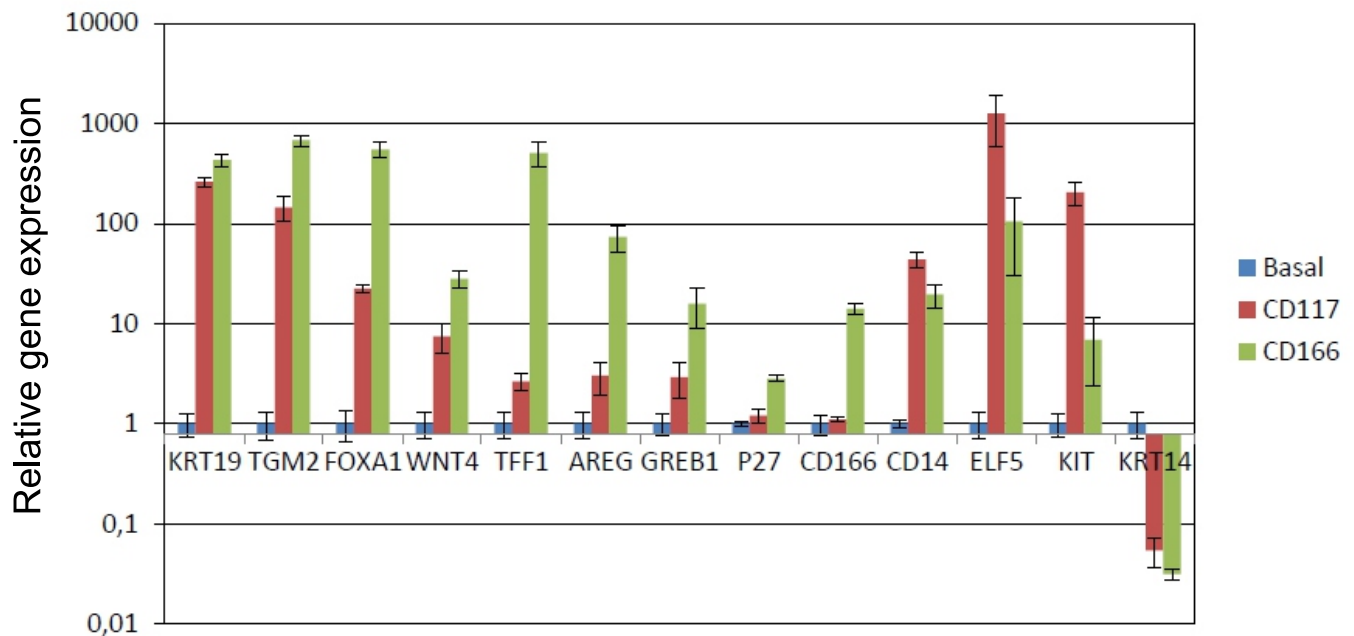

Bar graph representing qRT-PCR analysis of additional gene expression profiles in sorted basal, CD117<sup>high</sup>, and CD166<sup>high</sup> cells from three different biopsies. Each gene expression level was normalized by genomic mean of four reference gene expressions and then compared to normalized gene expression levels in basal cells. Error bars represent SEM of three biological samples which were each run in triplicate by qPCR.

**Supplementary Figure 6. Five out of six biopsies show a distinct CD166<sup>high</sup> population**

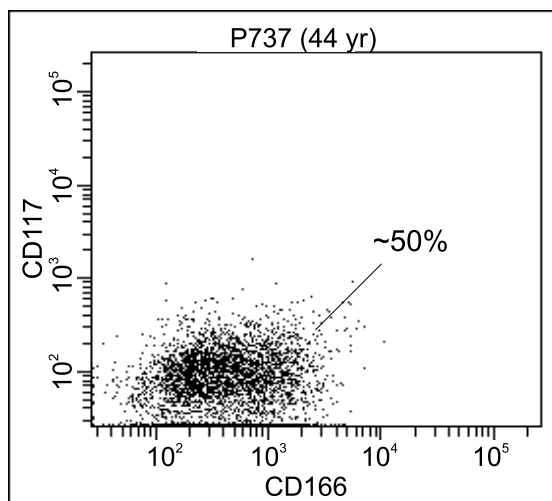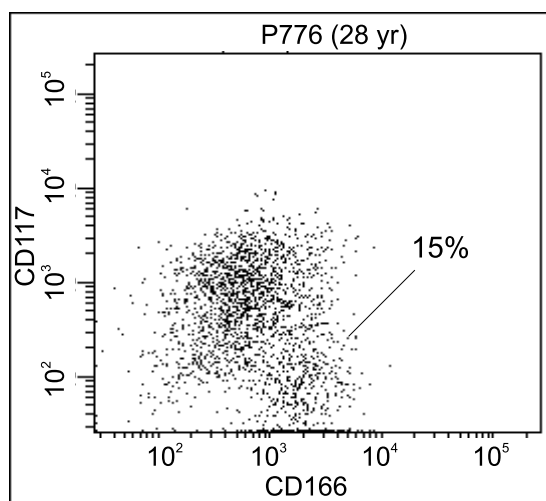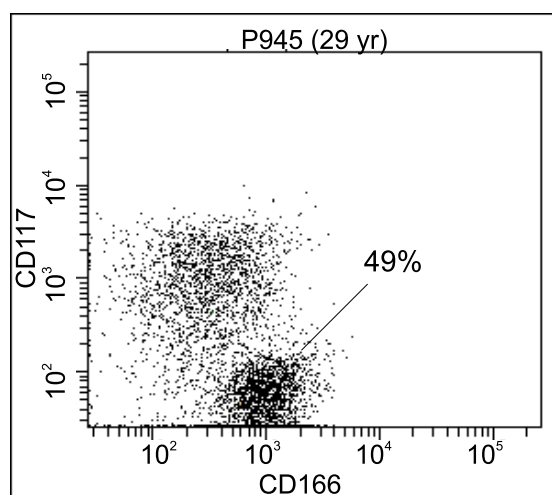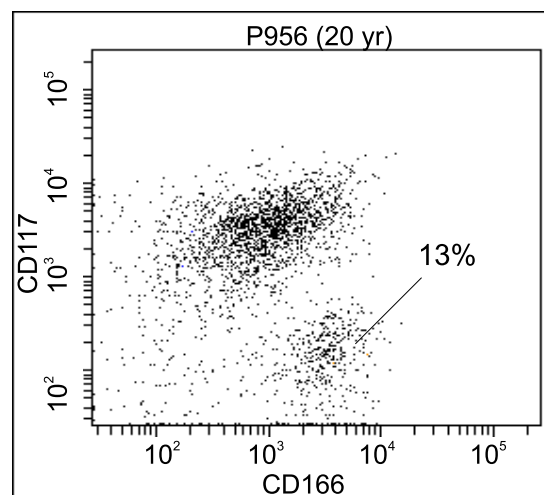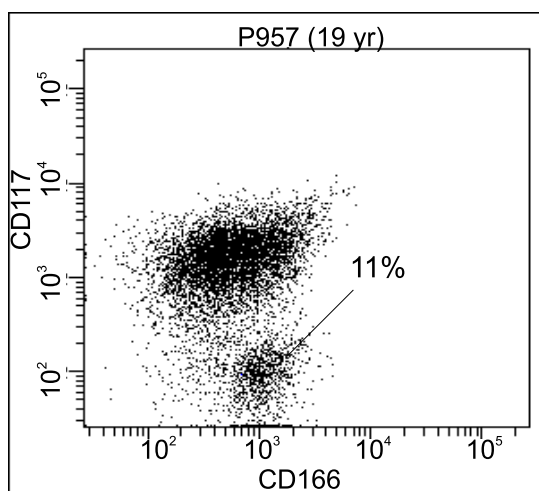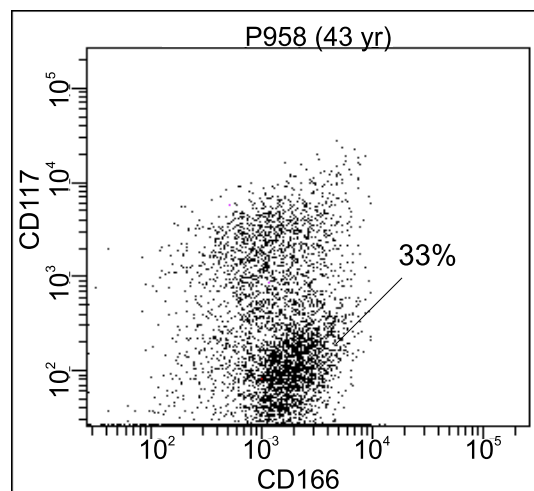

Representative FACS diagrams of uncultured HBEC from six biopsies sorted with CD166 and CD117.

**Supplementary Figure 7. Representative FACS profiles illustrating the separation of 67LR<sup>high</sup>/CD166<sup>high</sup> cells from uncultured HBECs**

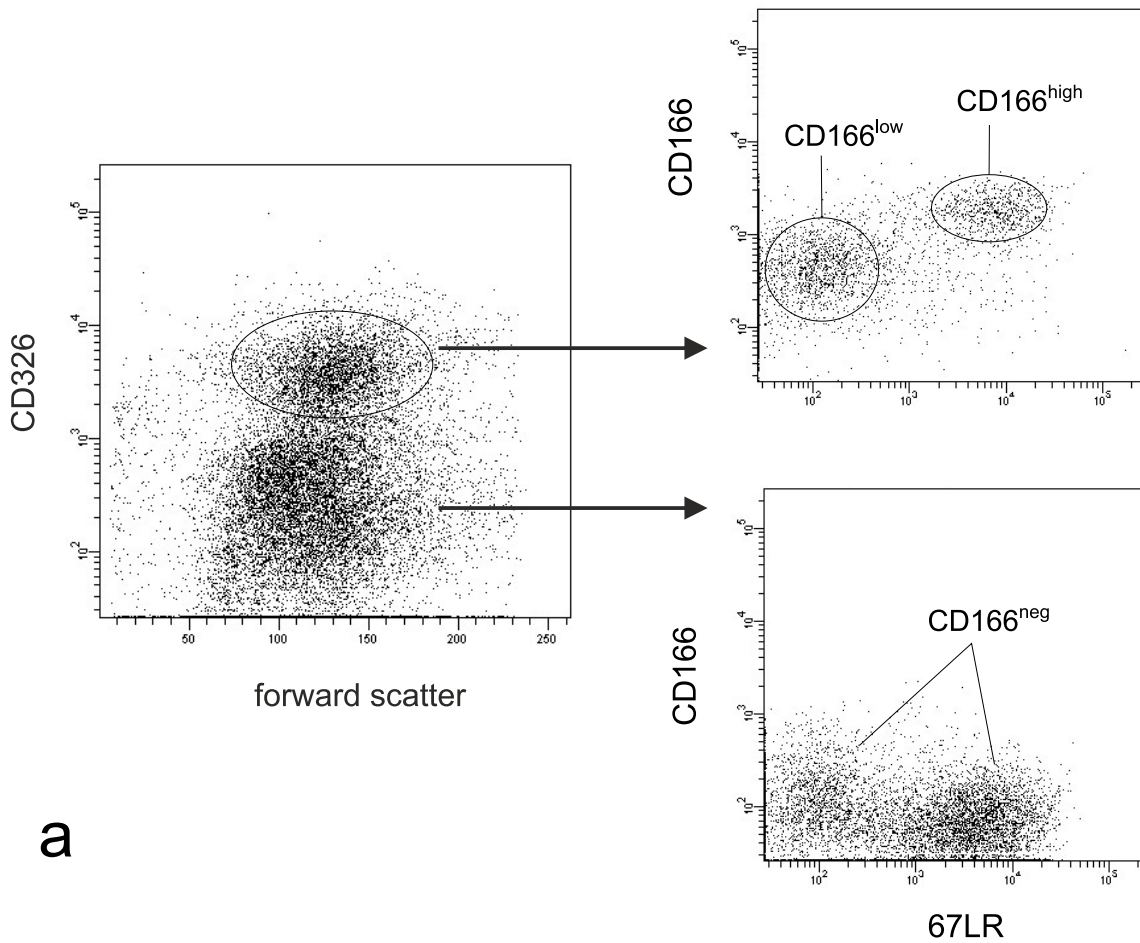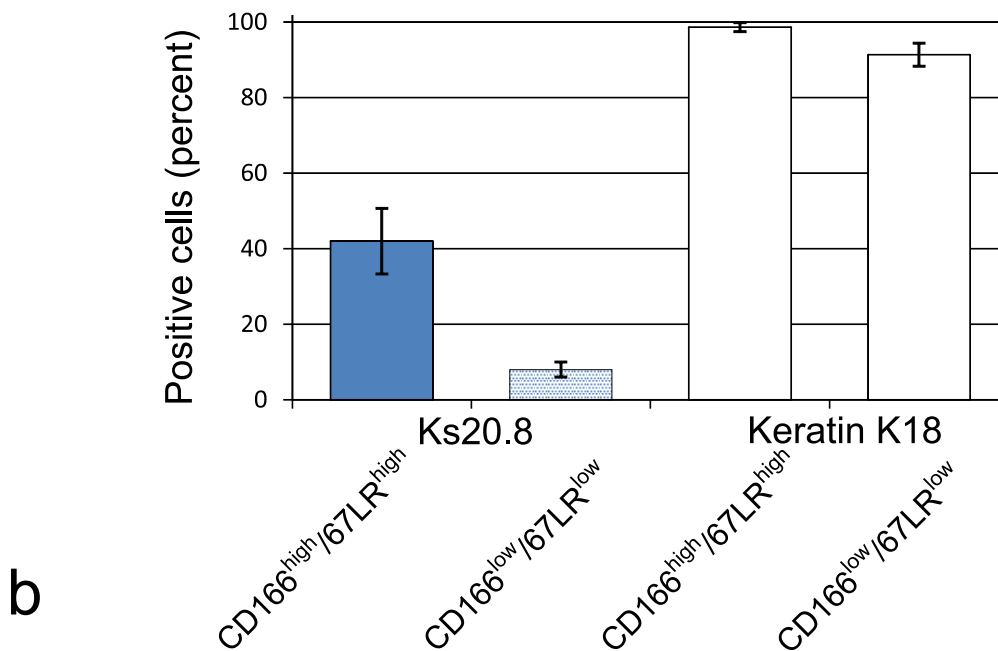

(a) A single cell suspension of primary breast epithelial cells stained with CD326, CD166 and 67LR followed by flow cytometry. Ks20.8<sup>pos</sup> HBEC sorted with the CD166<sup>high</sup>/67LR<sup>high</sup> gate. (b) Smears of FACS sorted cells stained with Ks20.8 (left) or keratin K18 (right). Frequency of positive cells (n = 3x50 cells per slide ±SD).

## Supplementary Figure 8. PCR array of human estrogen receptor signaling

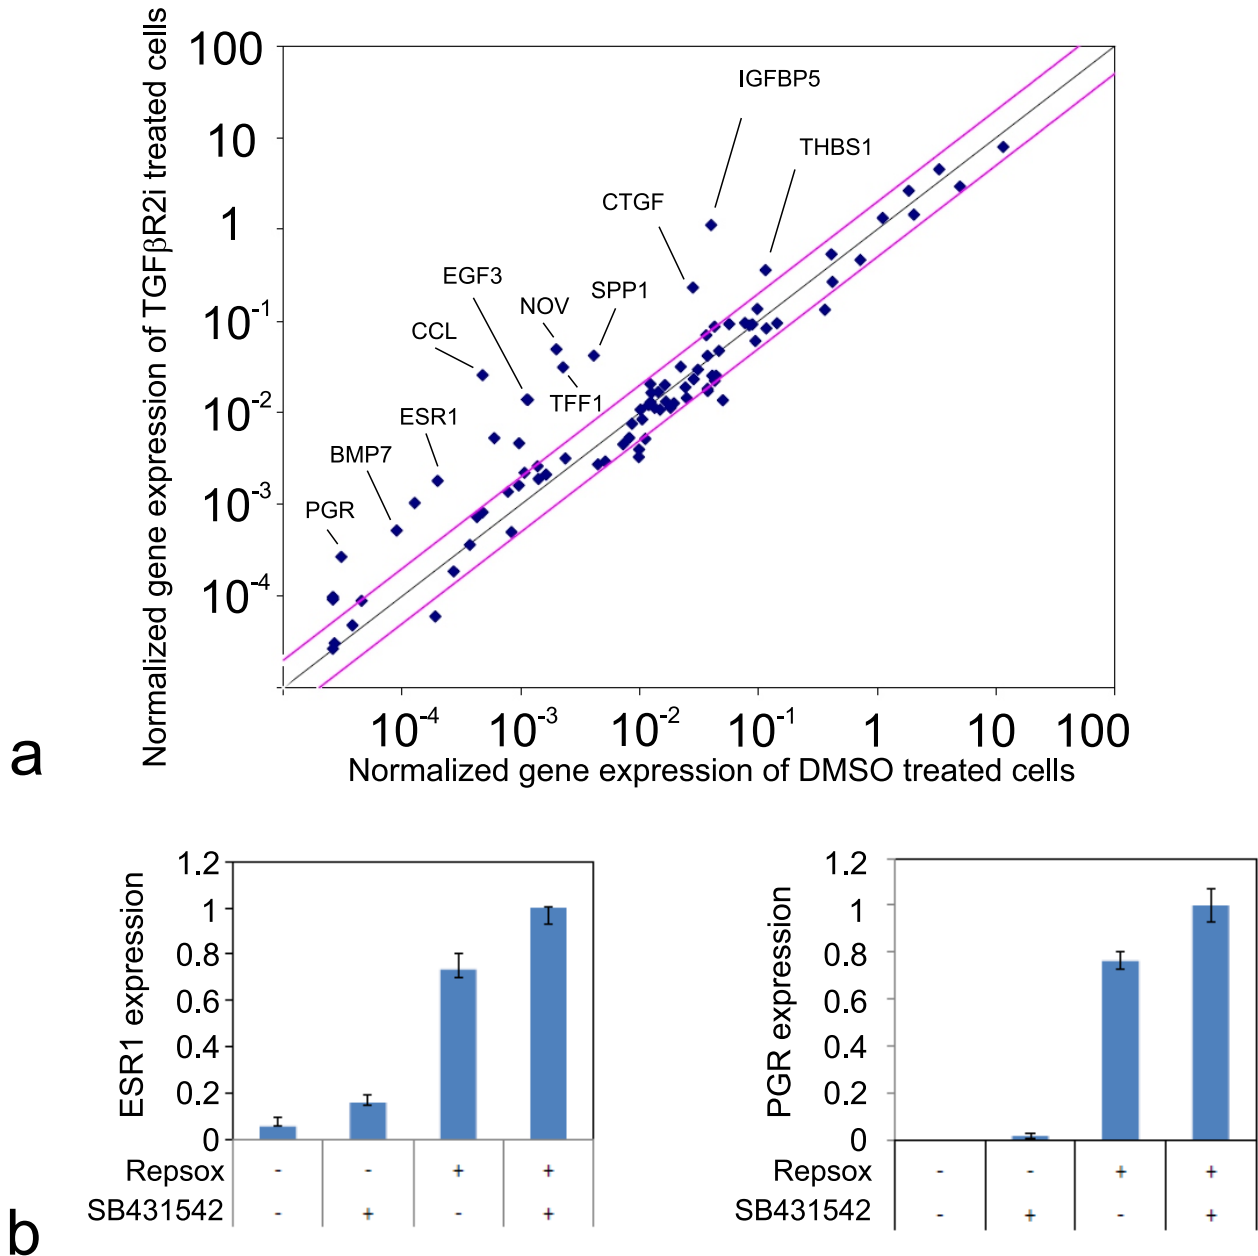

(a) Using a commercially available PCR array containing 84 genes involved in ER activation and its response, qRT-PCR was conducted with RNA samples of ER<sup>pos</sup> HBEC with or without TGFβR2i. Among them, 20 genes (some of which are labeled in the plot) were highly expressed in the presence of TGFβR2i. Scatter plot graph shows the expression level of each gene in TGFβR2i treated CD166<sup>high</sup> cells versus DMSO treated CD166<sup>high</sup> cells. The black line indicates no difference between samples, while the pink lines indicate a two-fold change in gene expression. Two biological replicates were run in qPCR with duplicates of each. (b) qRT-PCR of ESR1 and PGR expression in hTERT/shp16 transduced ER<sup>pos</sup> HBECs exposed to vehicle(DMSO), SB431542 alone, Repsox alone or TGFβR2i for 7 days. Note that the highest levels of expression were obtained in presence of TGFβR2i. Colored bars indicate the fold difference of the relative gene expression and error bars represent SD of triplicates in qPCR.



**Supplementary Figure 9. Full scale Western blots underlying Figure 4d**

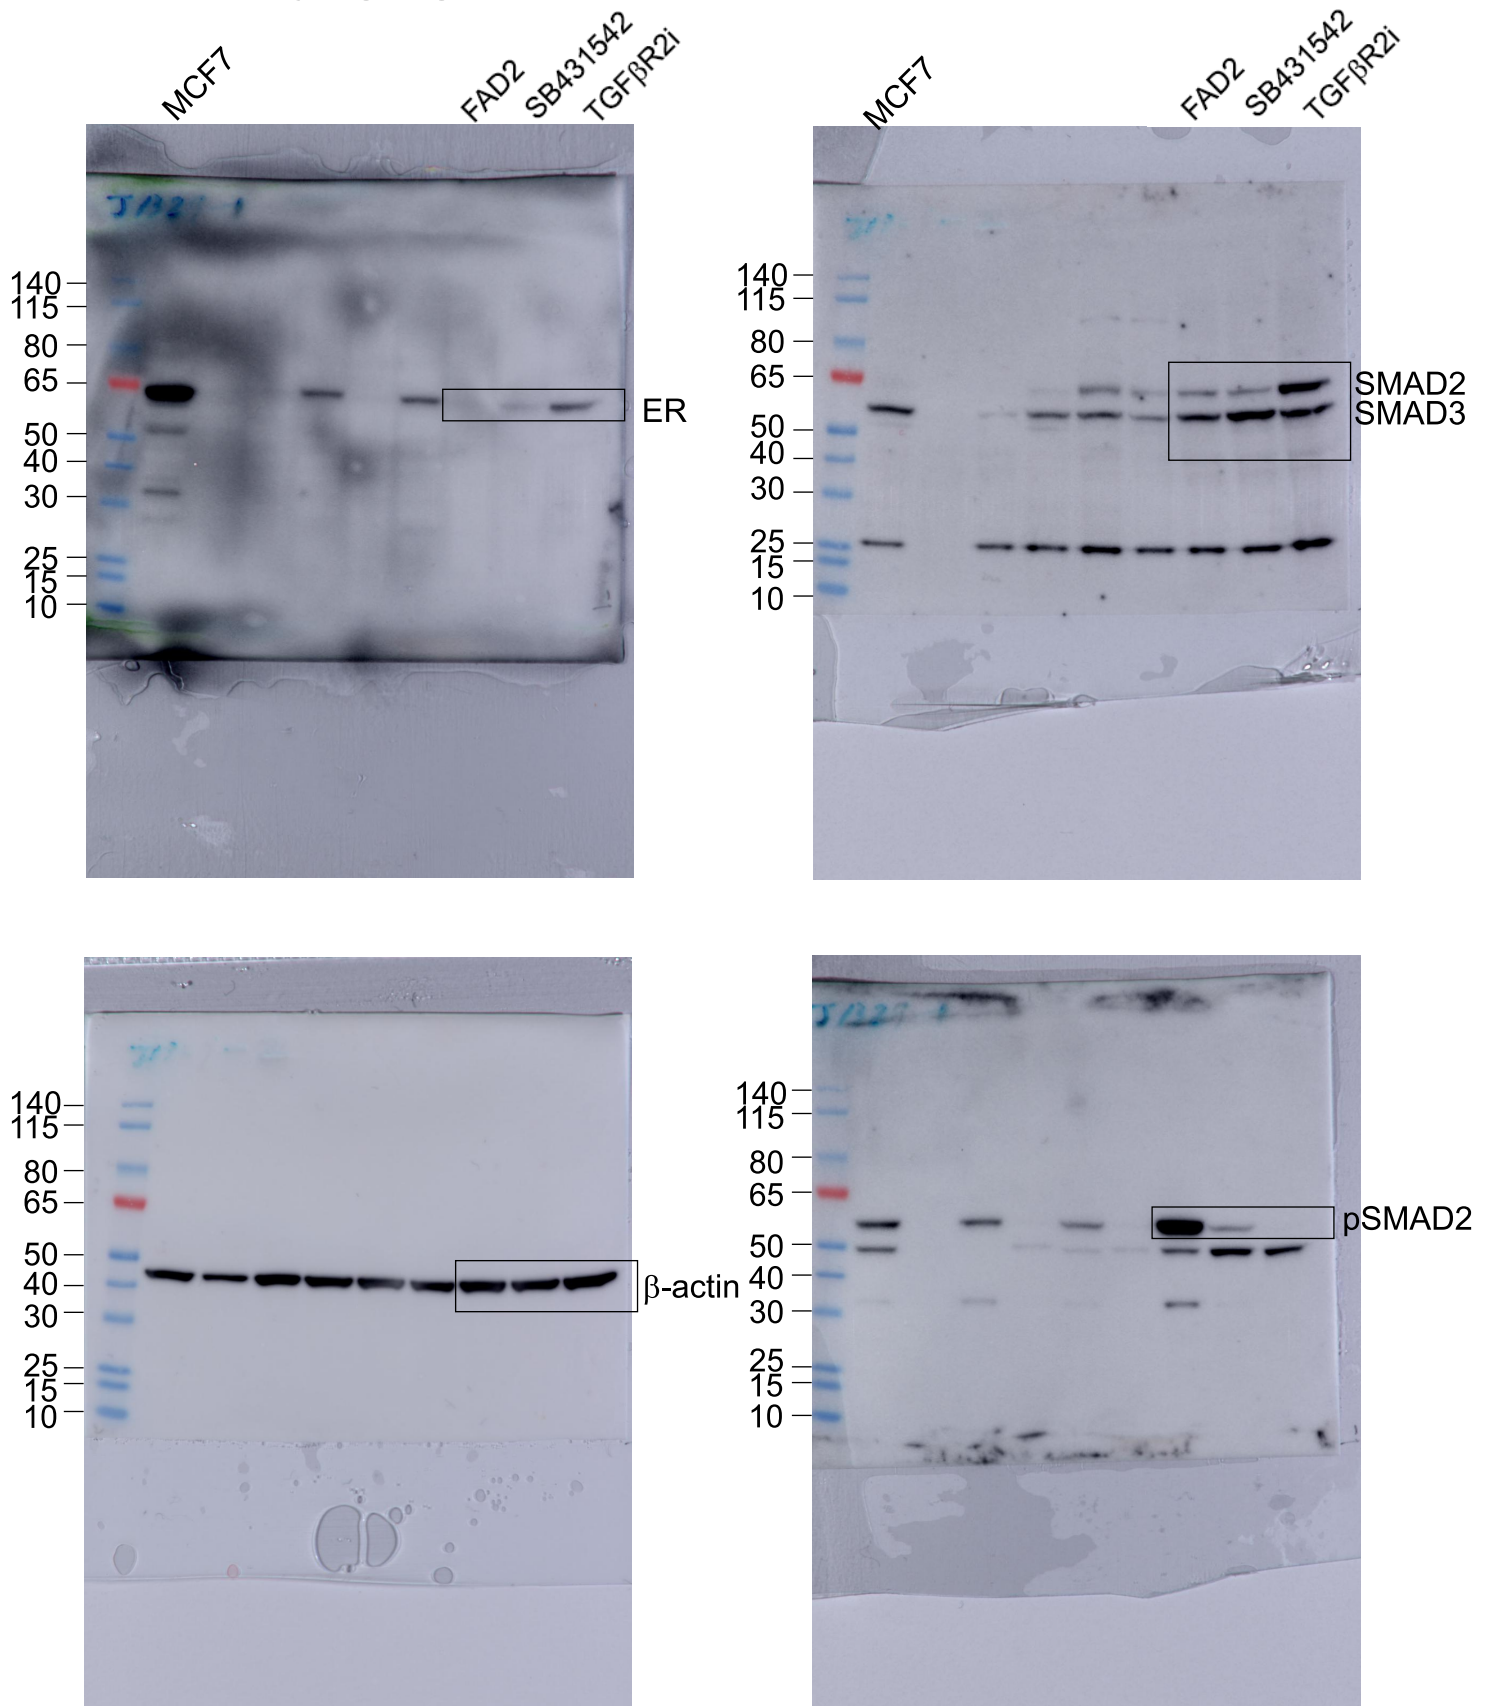

The frames indicate areas of the original Western blots selected for making the composite Figure 4d.

**Supplementary Figure 10.  $TGF\beta RII$  expression in  $ER^{pos}$  HBEC**

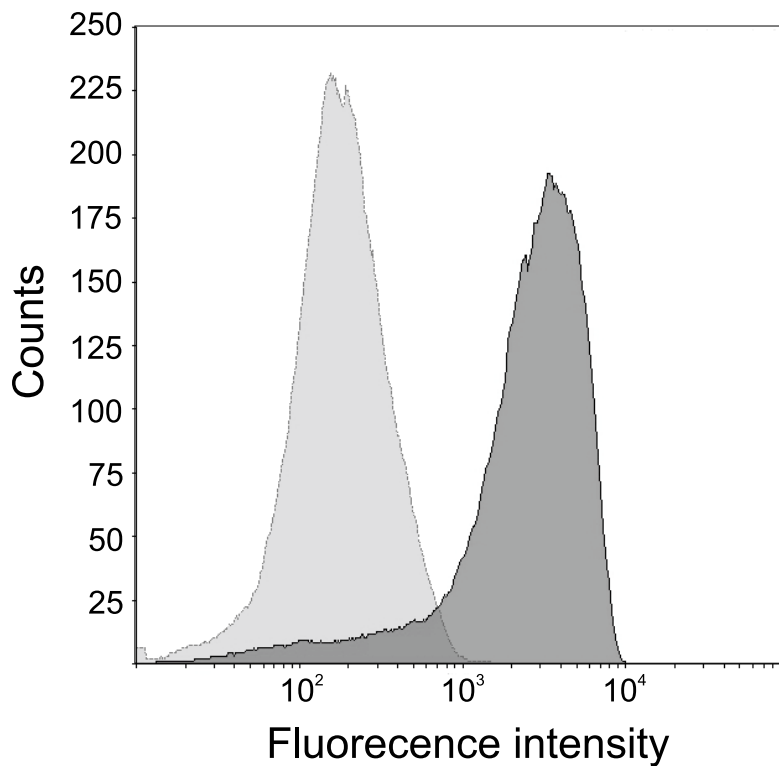

FACS analysis of  $TGF\beta RII$  surface expression in short-term cultured  $ER^{pos}$  HBEC. FITC- $TGF\beta RII$  (dark grey). FITC conjugated antibody in the absence of  $TGF\beta RII$  primary antibody (light grey).

**Supplementary Figure 11. hTERT/shp16 transduced cells remain ER<sup>pos</sup> and luminal-like**

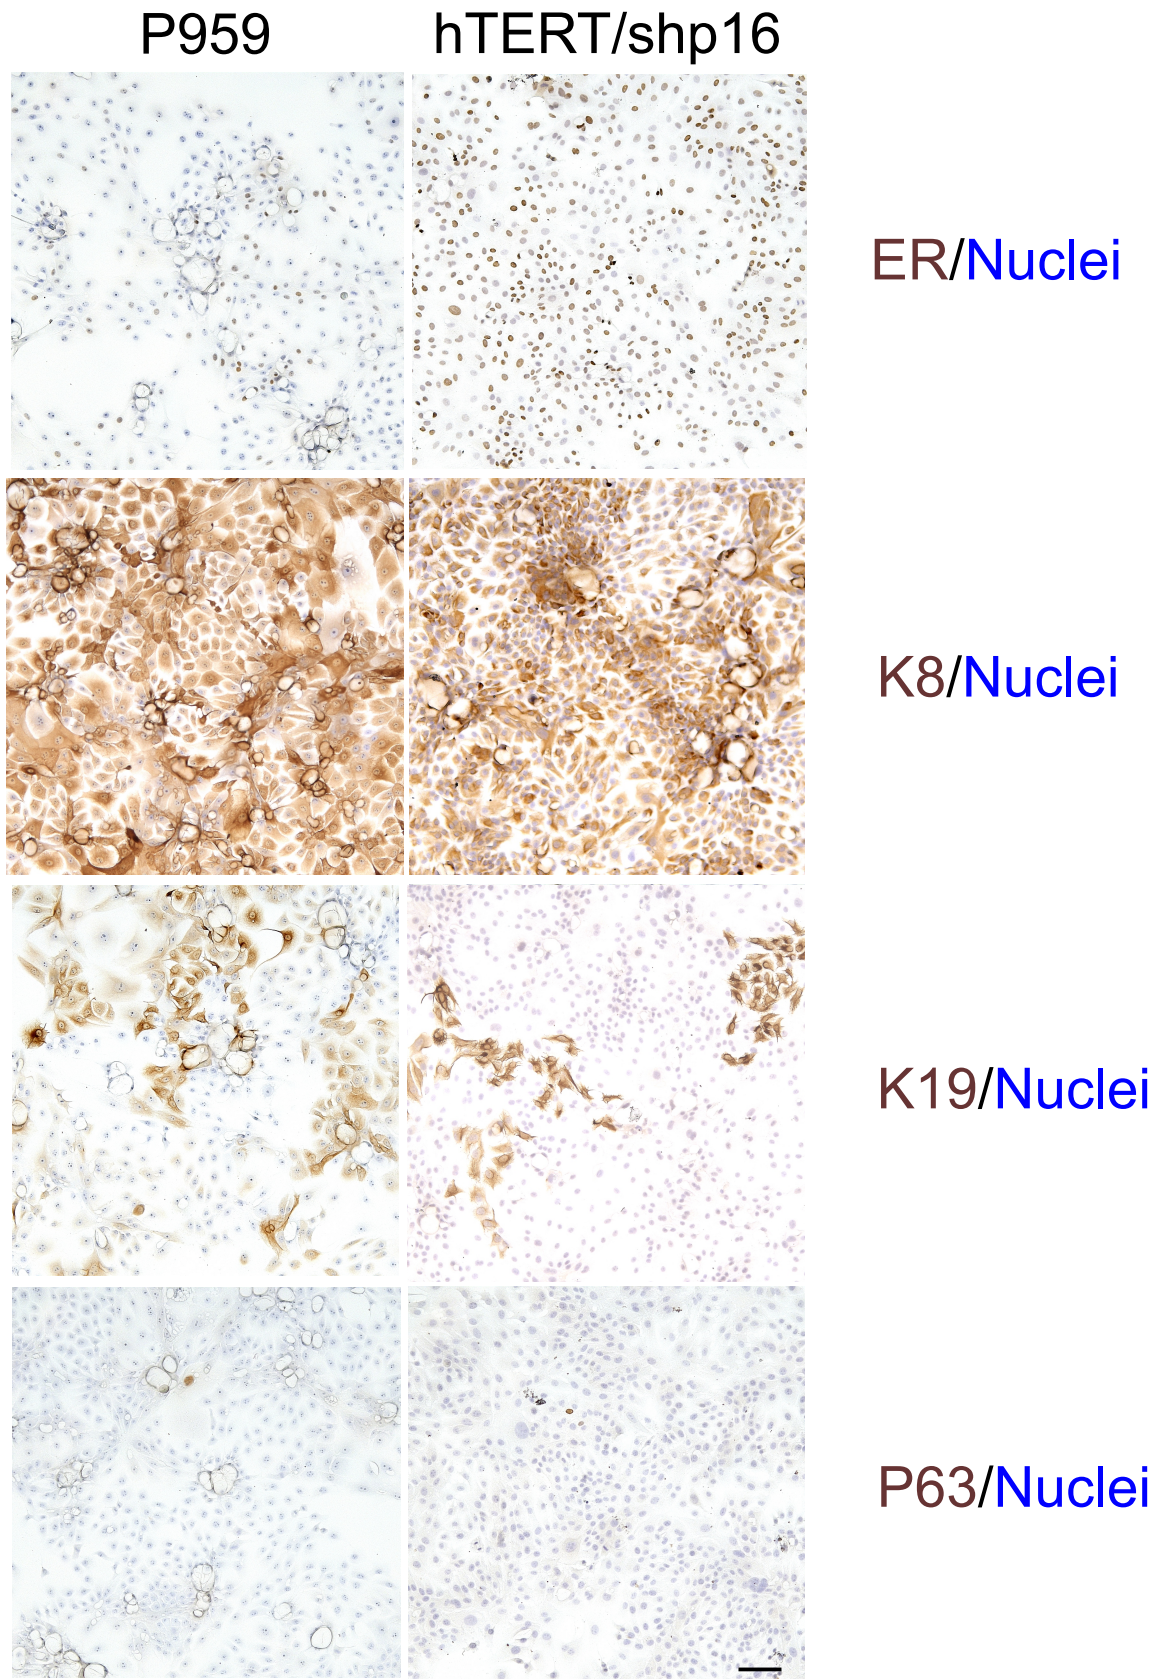

Immunoperoxidase staining of finite life span (left column) and hTERT/shp16 transduced (right column) ER<sup>pos</sup> HBEC with ER (SP1 prediluted), keratin K8 and K19 and P63. Cells were counterstained with hematoxylin. (Bar = 100µm)

**Supplementary Figure 12. Estrogen induced growth is completely abolished by pure antiestrogen**

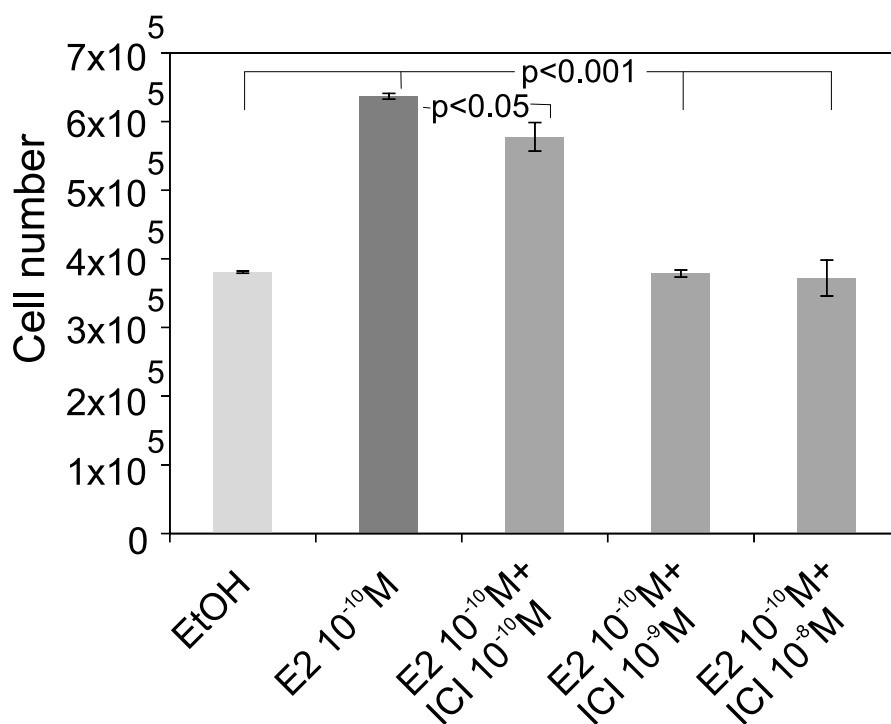

ER<sup>pos</sup> HBEC with extended lifespan (hTERT/shp16) exposed for six days to vehicle (EtOH), E2 or E2 plus increasing concentrations of ICI182,780/Fulvestrant/Faslodex. Note that the pure antiestrogen abolishes the growth promoting effect of estrogen. Significance was assessed by ANOVA followed by Tukey's HSD test. Error bars represent SD of duplicates in EtOH and E2 and triplicates in ICI treated samples.

**Supplementary Figure 13. Augmented effect of estrogen on ER<sup>pos</sup> HBEC by long-term exposure and omission of EGF**

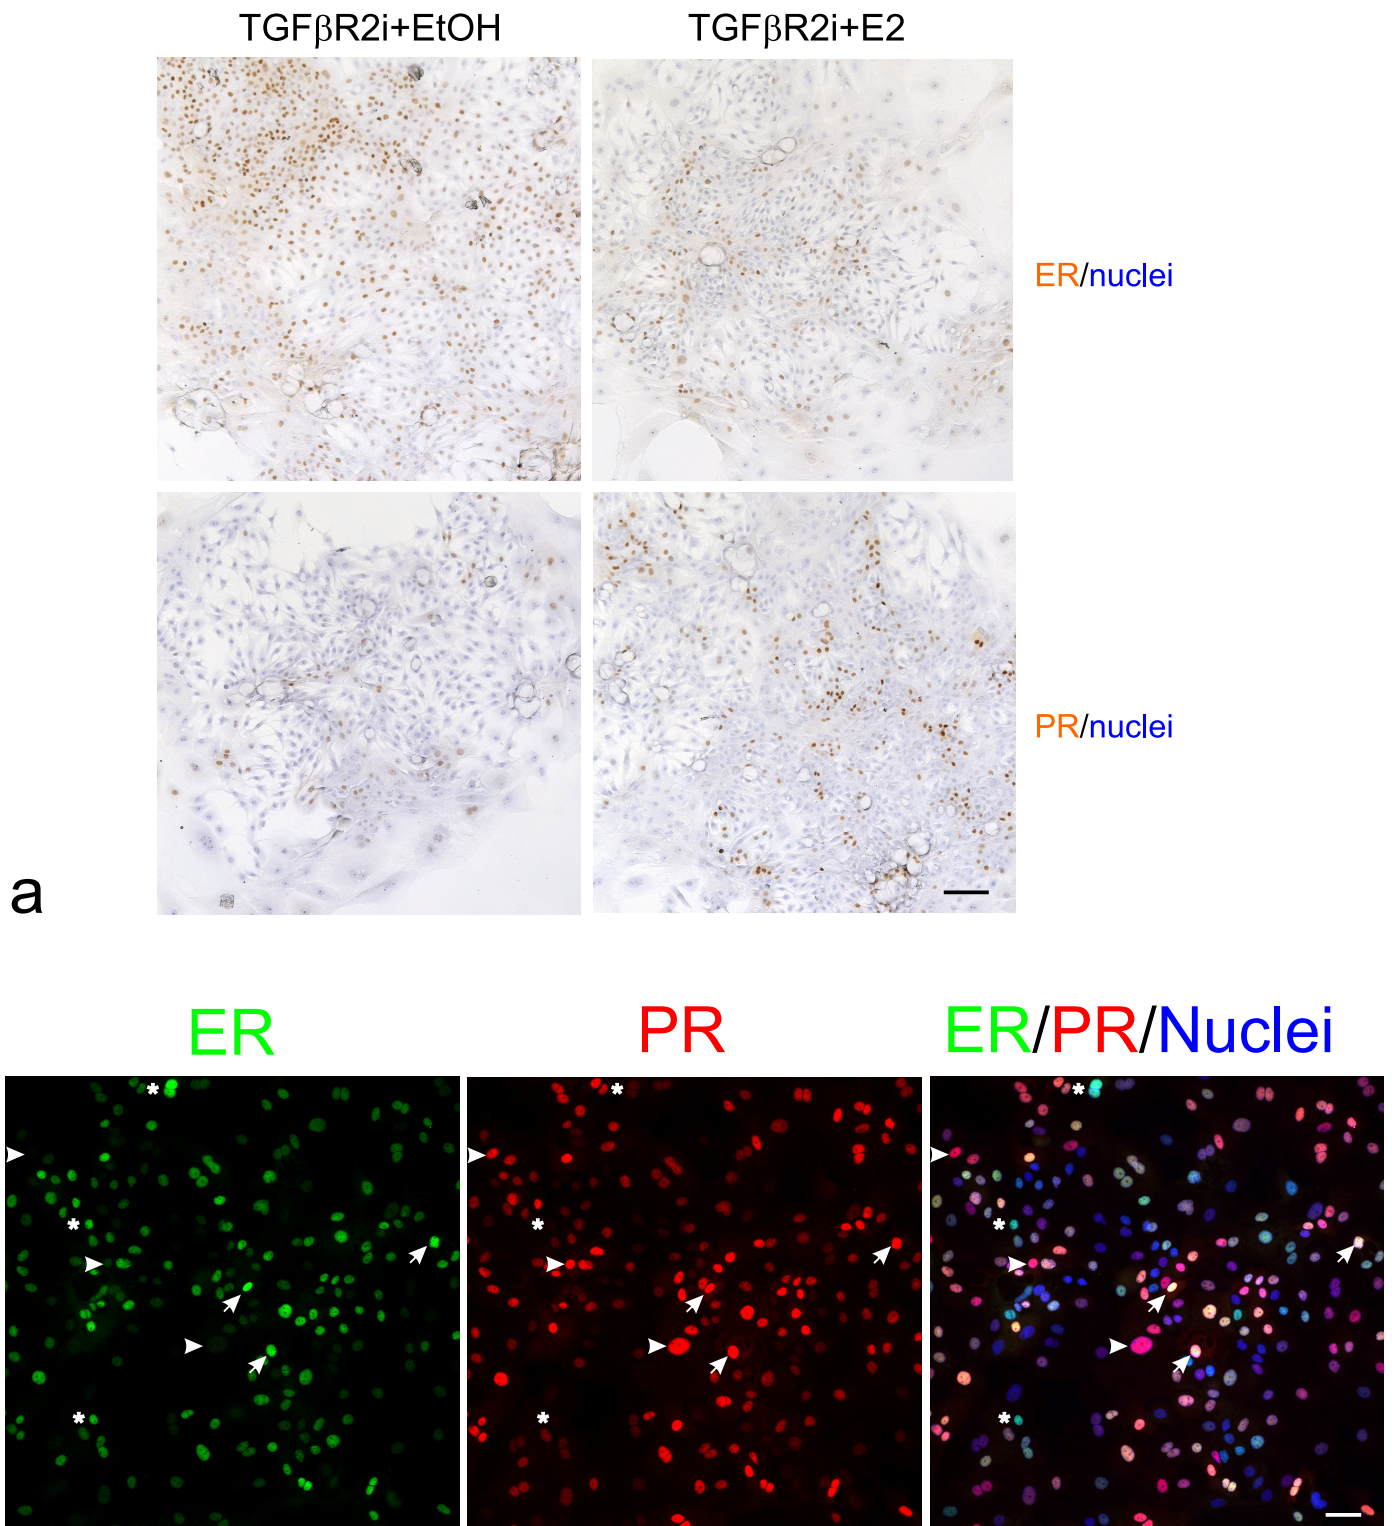

**a** Immunoperoxidase stainings of ER<sup>pos</sup> HBEC kept on TGFβR2i and in the presence of estrogen for two passages prior to omission of estrogen in the third passage (left column). Note the marked difference in staining with ER (SP1, prediluted) and PR (SAN27). Cells were counterstained with hematoxylin. (Bar = 100μm). **(b)** Multicolor imaging of ER<sup>pos</sup> HBEC in the presence of estrogen stained with ER (SP1; green), PR (PgR636; red) and nuclei (blue). Cells are either ER<sup>pos</sup> (asterisk), PR<sup>pos</sup> (arrowhead), ER<sup>pos</sup>/PR<sup>pos</sup> (arrows), or ER<sup>neg</sup>/PR<sup>neg</sup> (not labeled). (Bar = 50μm).

## Supplementary Table 1. List of primers used for qRT-PCR

| Gene symbol       | Assay ID      | Category                  |
|-------------------|---------------|---------------------------|
| <i>ACTA2</i>      | Hs00426835_g1 | Basal marker              |
| <i>CD200</i>      | Hs01033303_m1 | Basal marker              |
| <i>CD271</i>      | Hs00609977_m1 | Basal marker              |
| <i>IGFBP3</i>     | Hs00365742_g1 | Basal marker              |
| <i>KRT14</i>      | Hs00265033_m1 | Basal marker              |
| <i>KRT5</i>       | Hs00361185_m1 | Basal marker              |
| <i>MME</i>        | Hs00153510_m1 | Basal marker              |
| <i>NGR1</i>       | Hs00247620_m1 | Basal marker              |
| <i>SNAI2/SLUG</i> | Hs00950344_m1 | Basal marker              |
| <i>ST3GAL2</i>    | Hs00199480_m1 | Basal marker              |
| <i>AREG</i>       | Hs00950669_m1 | Luminal marker            |
| <i>BIM</i>        | HS00708019_s1 | Luminal marker            |
| <i>CD166</i>      | Hs00977640_m1 | Luminal marker            |
| <i>CDKN1B/P27</i> | Hs00153277_m1 | Luminal marker            |
| <i>ESR1</i>       | Hs00174860_m1 | Luminal marker            |
| <i>FOXA1</i>      | Hs00270129ml  | Luminal marker            |
| <i>GATA3</i>      | Hs00231122_m1 | Luminal marker            |
| <i>GREB1</i>      | Hs00536409_m1 | Luminal marker            |
| <i>ID2</i>        | Hs04187239_m1 | Luminal marker            |
| <i>KRT18</i>      | Hs02827483_g1 | Luminal marker            |
| <i>KRT19</i>      | Hs00761767_s1 | Luminal marker            |
| <i>KRT8</i>       | Hs01595539_g1 | Luminal marker            |
| <i>MYB</i>        | Hs00920556_m1 | Luminal marker            |
| <i>NGRN</i>       | Hs04185079_g1 | Luminal marker            |
| <i>PGR</i>        | Hs01556702_m1 | Luminal marker            |
| <i>SORT1</i>      | Hs00361760_m1 | Luminal marker            |
| <i>TFF1</i>       | Hs00907239_m1 | Luminal marker            |
| <i>TGM2</i>       | Hs00190278_m1 | Luminal marker            |
| <i>WNT4</i>       | Hs01573504_m1 | Luminal marker            |
| <i>DPP4</i>       | HS00175210_m1 | Luminal progenitor marker |
| <i>ALDH1A3</i>    | Hs00167476_m1 | Luminal progenitor marker |
| <i>CD14</i>       | Hs00169122_g1 | Luminal progenitor marker |
| <i>CYP24A1</i>    | Hs00167999_m1 | Luminal progenitor marker |
| <i>DAPP1</i>      | Hs00183937_m1 | Luminal progenitor marker |
| <i>ELF5</i>       | Hs01063022_m1 | Luminal progenitor marker |
| <i>KIT</i>        | Hs00174029_m1 | Luminal progenitor marker |
| <i>KRT15</i>      | Hs00267035_m1 | Luminal progenitor marker |
| <i>NCALD</i>      | Hs00230737_m1 | Luminal progenitor marker |
| <i>PIGR</i>       | Hs00922561_m1 | Luminal progenitor marker |
| <i>Sox9</i>       | Hs01001343_g1 | Luminal progenitor marker |
| <i>GAPDH</i>      | Hs02758991_g1 | Reference                 |
| <i>HPRT1</i>      | Hs99999909_m1 | Reference                 |
| <i>TBP</i>        | Hs00427621_m1 | Reference                 |
| <i>TFRC</i>       | Hs00951083_m1 | Reference                 |
